# Supplementary material for: Normal cognitive and social development require posterior cerebellar activity
Source: eLife journal article supplement (doi:10.7554/elife.36401), 2018-09-18

**A**

## Eyeblink training in all controls

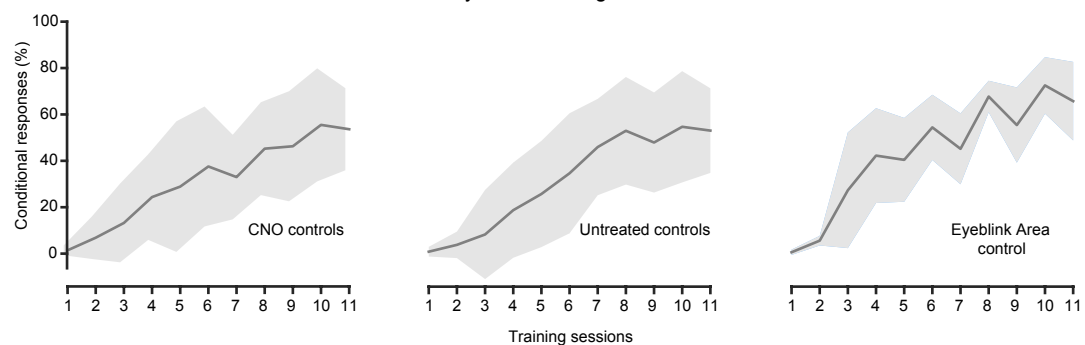**B**

## Eyeblink training in acute perturbation

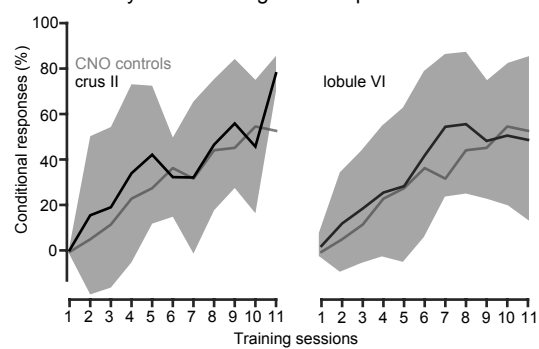**C**

## Eyeblink training in developmental perturbation

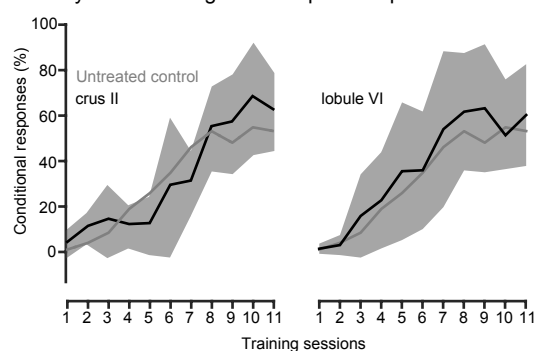

Supplement: supp [file elife_poa_e36401_Figure_2_figure_supplement_1.pdf › elife_poa_e36401_Figure_2_figure_supplement_1.pdf]
