# Supplementary material for: Normal cognitive and social development require posterior cerebellar activity
Source: eLife journal article supplement (doi:10.7554/elife.36401), 2018-09-18

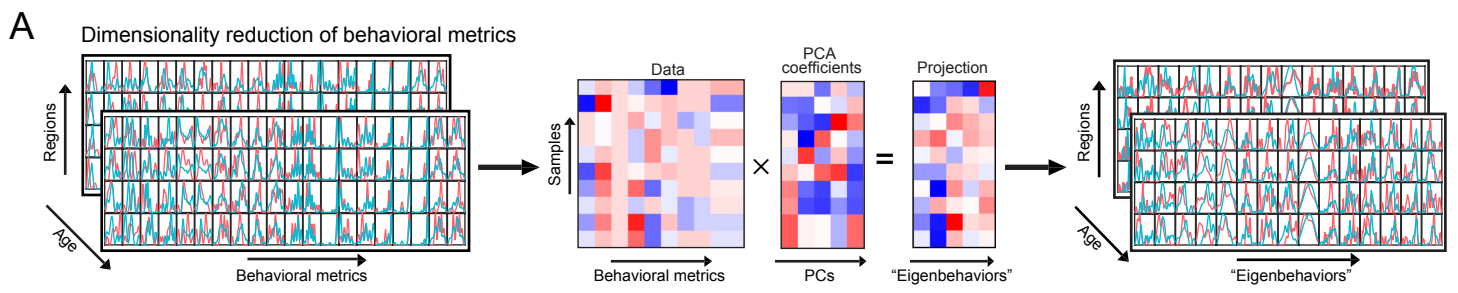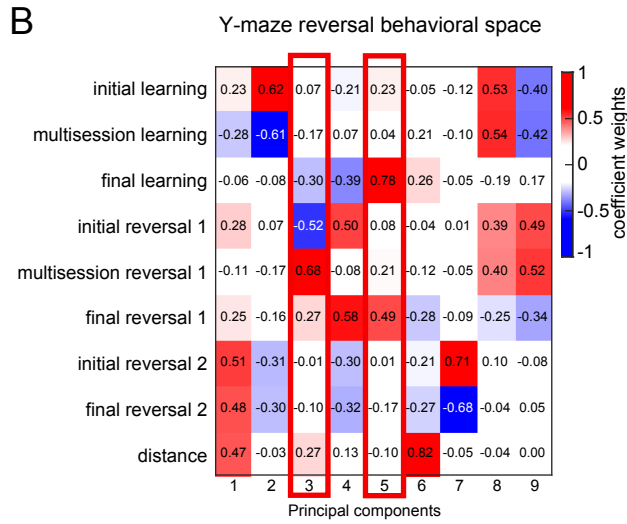

Components that separate untreated from DREADD-intoxicated and CNO treated mice (both Acute and Developmental groups)

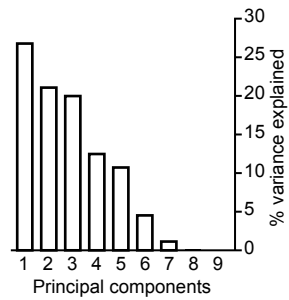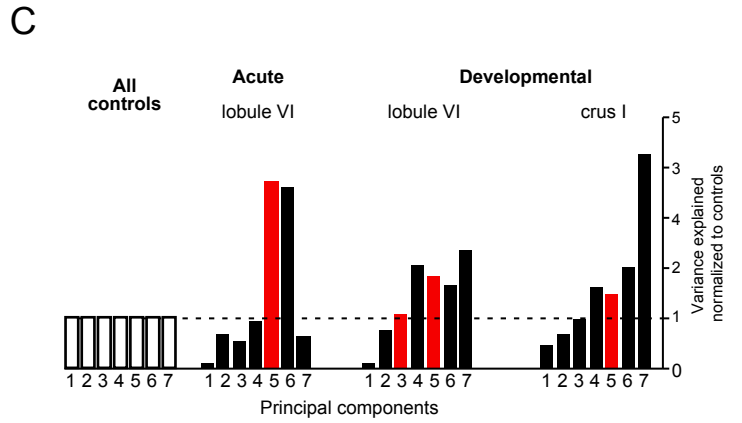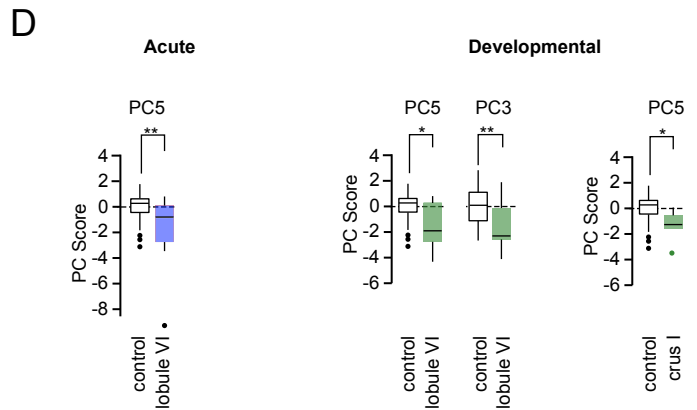

Supplement: supp [file elife_poa_e36401_Figure_5_figure_supplement_1.pdf › elife_poa_e36401_Figure_5_figure_supplement_1.pdf]
