# Supplementary material for: Normal cognitive and social development require posterior cerebellar activity
Source: eLife journal article supplement (doi:10.7554/elife.36401), 2018-09-18

A

No chamber bias (baseline vs test condition)

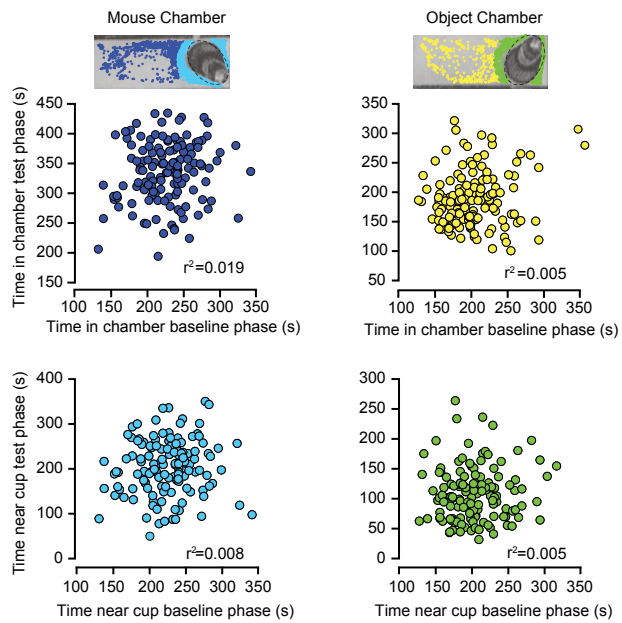

B

Control distributions all social chamber metrics

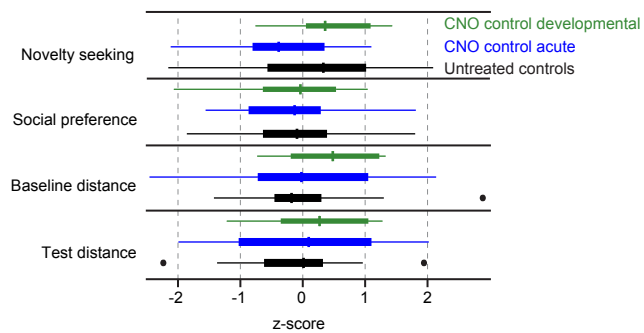

C

Social chamber movement metrics

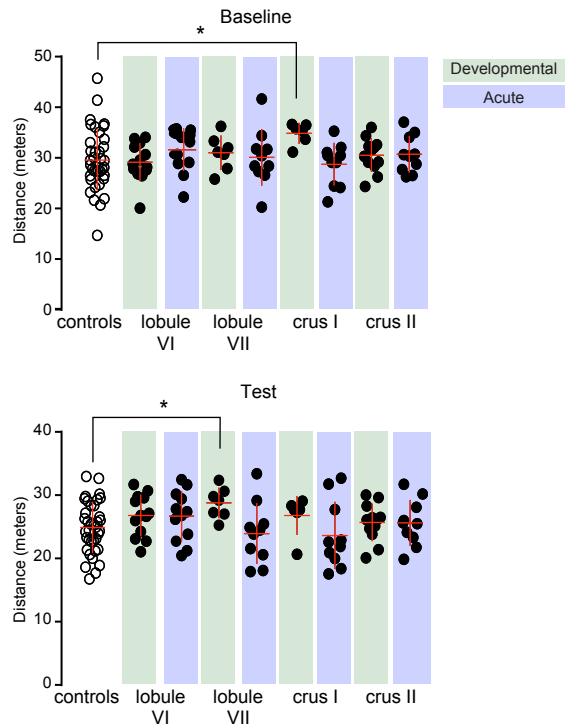

Supplement: supp [file elife_poa_e36401_Figure_6_figure_supplement_1.pdf › elife_poa_e36401_Figure_6_figure_supplement_1.pdf]
