# Supplementary material for: Normal cognitive and social development require posterior cerebellar activity
Source: eLife journal article supplement (doi:10.7554/elife.36401), 2018-09-18

A

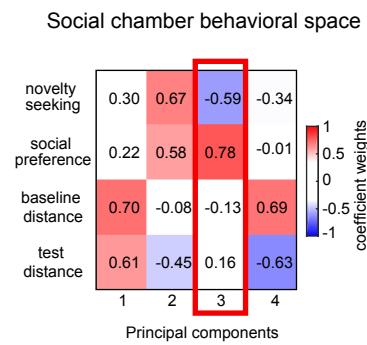

3 Components that separate untreated from DREADD-injected and CNO-treated mice (both Acute and Developmental groups)

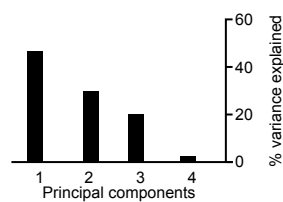

B

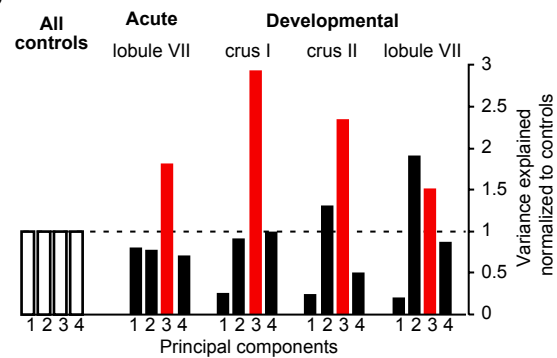

C

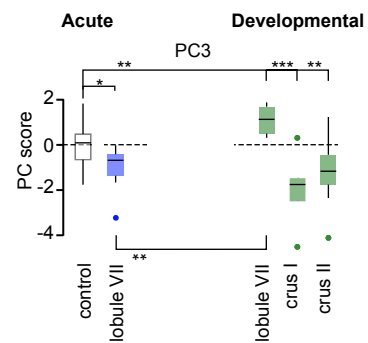

Supplement: supp [file elife_poa_e36401_Figure_6_figure_supplement_2.pdf › elife_poa_e36401_Figure_6_figure_supplement_2.pdf]
