# Supplementary material for: Normal cognitive and social development require posterior cerebellar activity
Source: eLife journal article supplement (doi:10.7554/elife.36401), 2018-09-18
Supplement: supp [file elife_poa_e36401_Figure_7_figure_supplement_2.pdf › elife_poa_e36401_Figure_7_figure_supplement_2.pdf]

Novelty-seeking

$$\frac{((\text{EntrM}_{\text{BS}} + \text{EntrO}_{\text{BS}}) - (\text{EntrM}_{\text{test}} + \text{EntrO}_{\text{test}}))}{(\text{EntrM}_{\text{BS}} + \text{EntrO}_{\text{BS}})}$$

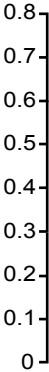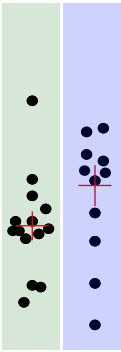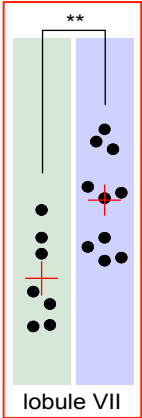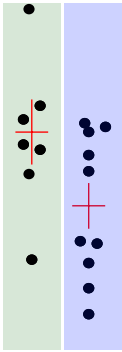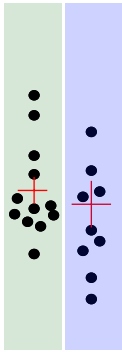

Developmental

Acute
