# Supplementary material for: Normal cognitive and social development require posterior cerebellar activity
Source: eLife. 2018 Sep 20;7:e36401. doi: 10.7554/eLife.36401 (PMC6195348; doi:10.7554/eLife.36401)
Supplement: Table 3—source data 1. [file elife-36401-table3-data1.xlsx]

## Sheet: FinalTable3_S1
Table 3 - source data 1
		Flexible/Social/Learning metrics
		Y-maze reversal
		Initial learning	Multisession learning	Final learning	Initial reversal 1	Multisession reversal 1	Final reversal 1	Initial reversal 2	Final reversal 2
Lobule VI	Developmental	0.213497	0.3	0.0542921	-0.1	1.1	0.8	0.4	0.2
	Acute	0.507031	1	0.450863	0.6	0.9	0.5	0.5	0.2
Lobule VII	Developmental	-0.108203	-0.2	0.646035	-0.5	-0.3	0.1	-0.5	-0.2
	Acute	0.455419	0	-0.587305	-0.6	0.3	0.2	-0.5	0.1
Crus I	Developmental	-0.193782	-0.4	0.354877	-0.5	0.6	0.6	-0.5	0
	Acute	0.168231	0.3	-0.00817439	0.2	0.3	0.3	0.3	0.1
Crus II	Developmental	-0.0424895	-0.1	0.0963028	-0.5	-0.5	0	0	0.1
	Acute	0.920926	0.6	-0.56356	-0.6	-0.6	0	0.3	0
		Three-chamber		Elevated plus-maze				Grooming	Eyeblink conditioning
		Social preference	Novelty-seeking	Commitment	Open-arm preference	Exploration time	Exploration entrances	Grooming ratio	% Conditional responses session 11
Lobule VI	Developmental	-0.0596712	0.677067	-0.0287326	0.3	0.4	0.467673	-0.555806	-0.322685
	Acute	0.153955	-0.0477657	-0.333469	0.3	0.6	0.837015	0.0879941	0.146335
Lobule VII	Developmental	-0.28845	1.06329	0.0262578	0.9	1.7	0.807992	1.18454	nd
	Acute	0.906949	-0.438985	-0.69108	-0.9	0.5	0.692286	0.199815	nd
Crus I	Developmental	1.1932	-0.829571	-0.951596	0.1	0.3	0.420314	0.018019	1.58748
	Acute	0	0.270886	0.0965667	-0.6	-0.1	0.204284	0.917033	1.0463
Crus II	Developmental	1.2493	0.0253329	0.0421953	0.6	-0.3	0.697523	-0.487823	-0.528701
	Acute	0.0282928	0.241052	-0.187321	-0.8	-0.2	-0.0462261	0.908156	0.285642
		Movement metrics
		Gait	Y-maze	Three-chamber		EPM
		Stance	Distance	Distance BS	Distance TEST	Distance
Lobule VI	Developmental	0.1	-0.0824332	0.0792967	-0.514476	0.7
	Acute	-0.3	-0.689746	-0.384336	-0.424979	0.7
Lobule VII	Developmental	0.2	-0.184545	-0.284888	-1.14114	1.2
	Acute	0.5	0.063291	-0.0859144	0.225413	0.3
Crus I	Developmental	-0.3	-0.418863	-1.1489	-0.501682	0.7
	Acute	0.7	0.212987	0.17255	0.275216	0.01
Crus II	Developmental	0.1	-0.299391	-0.184562	-0.225366	1.2
	Acute	0.3	0.196467	-0.220004	-0.181821	-0.3
