# Supplementary figures and images for: Normal cognitive and social development require posterior cerebellar activity
Source: eLife journal article supplement (doi:10.7554/elife.36401), 2018-09-18

## Expression profiles

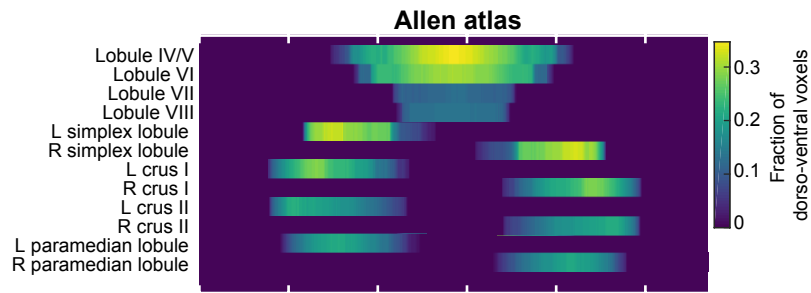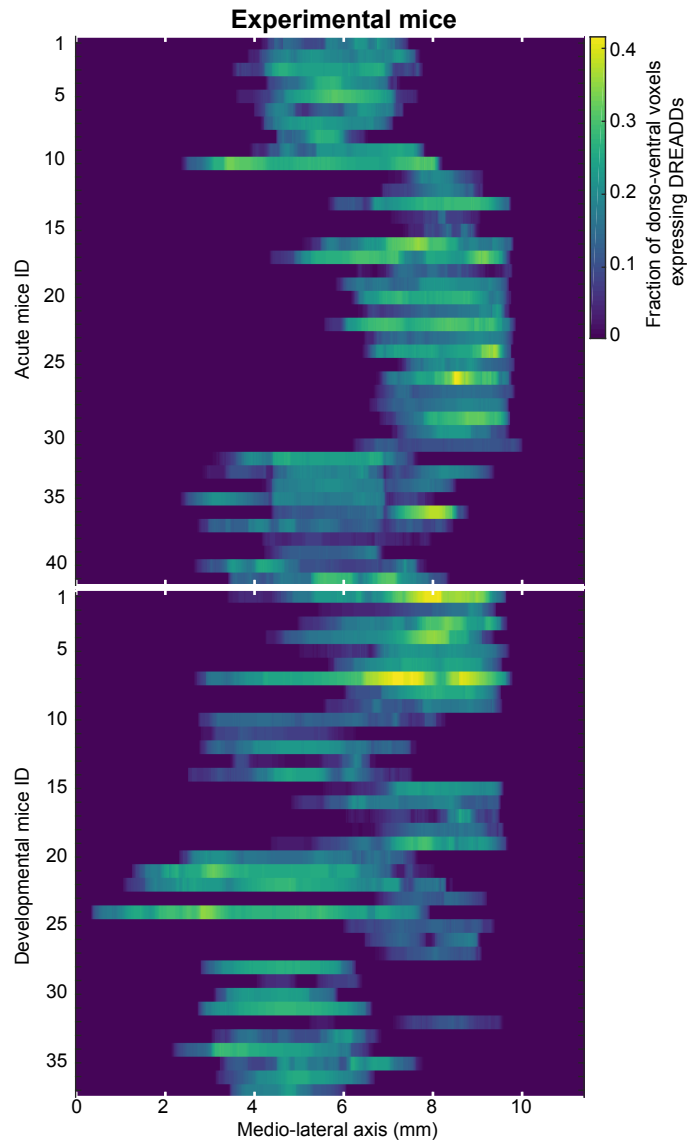

Supplement: supp [file elife_poa_e36401_Figure_10_figure_supplement_1.pdf › elife_poa_e36401_Figure_10_figure_supplement_1.pdf]

A

Crus I injection

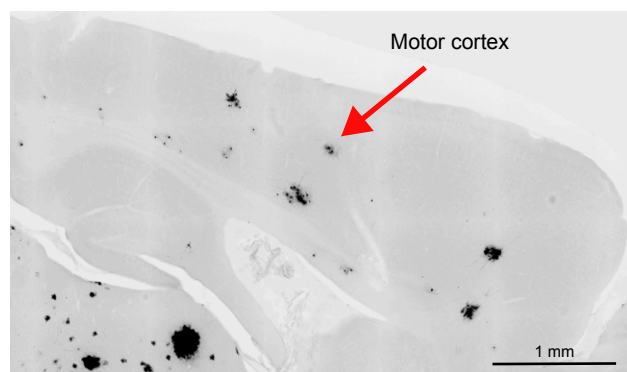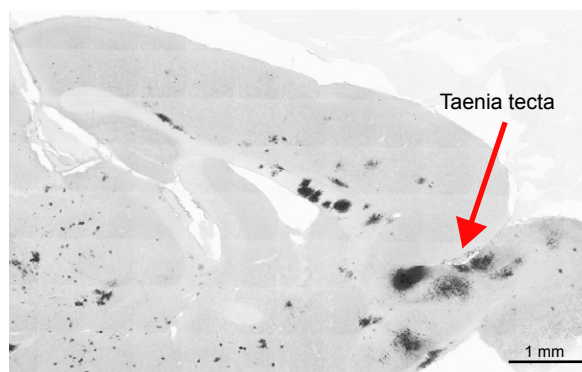

B

Lobule VI injection

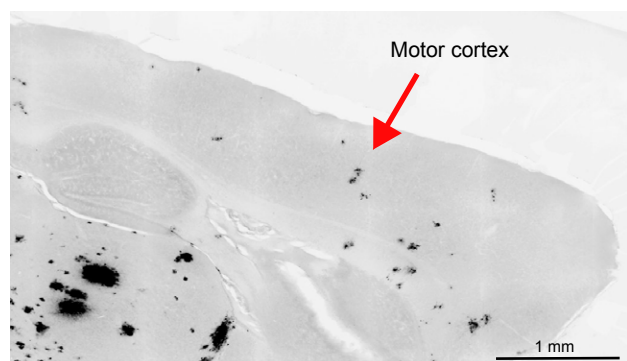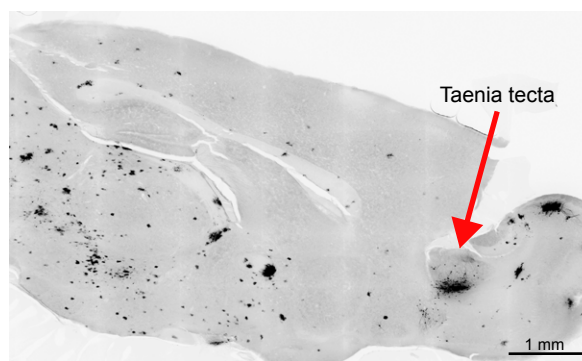

Supplement: supp [file elife_poa_e36401_Figure_11_figure_supplement_1.pdf › elife_poa_e36401_Figure_11_figure_supplement_1.pdf]

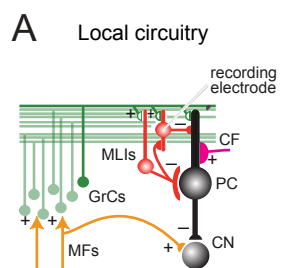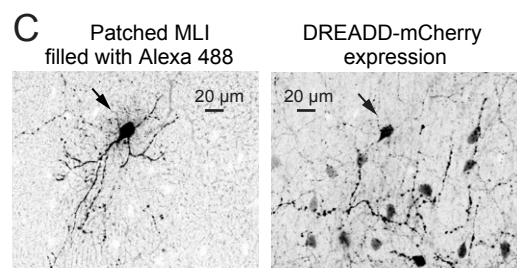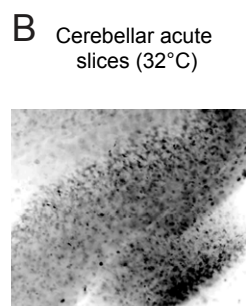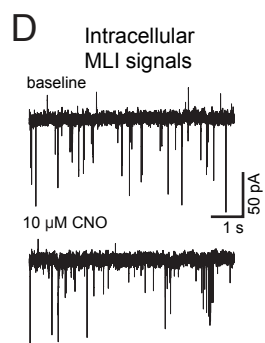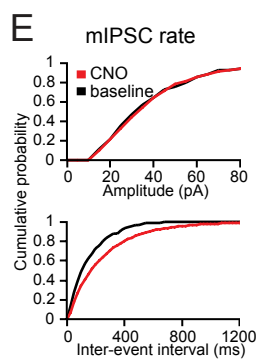

Supplement: supp [file elife_poa_e36401_Figure_1_figure_supplement_1.pdf › elife_poa_e36401_Figure_1_figure_supplement_1.pdf]

# Control distributions Y-maze metrics

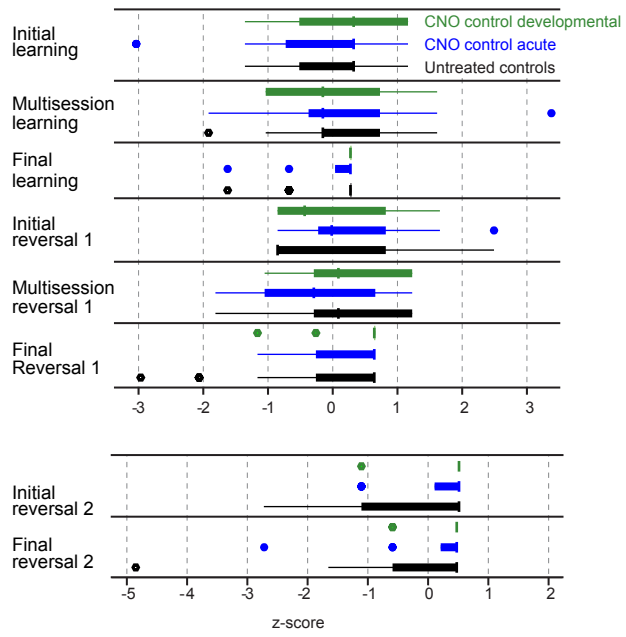

Supplement: supp [file elife_poa_e36401_Figure_4_figure_supplement_1.pdf › elife_poa_e36401_Figure_4_figure_supplement_1.pdf]

A

## Long-term effects of CNO exposure on EPM metrics

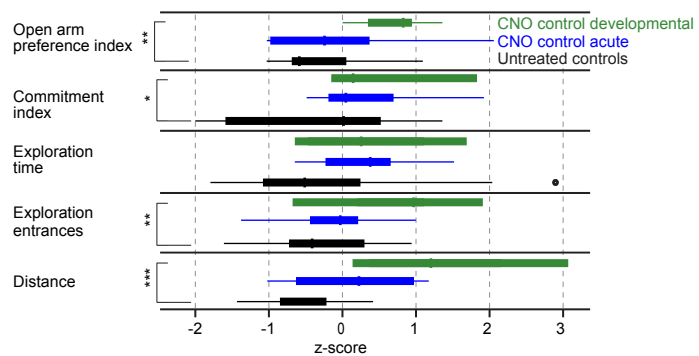

B

## EPM movement metrics

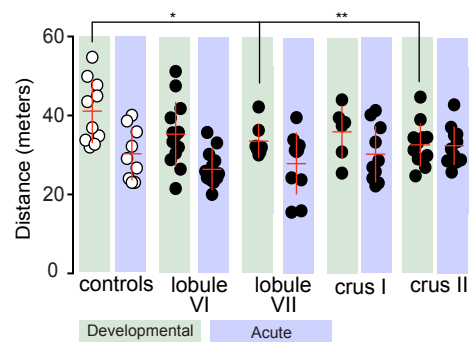

Supplement: supp [file elife_poa_e36401_Figure_7_figure_supplement_1.pdf › elife_poa_e36401_Figure_7_figure_supplement_1.pdf]
